# Supplementary figures and images for: A genetic IFN/STAT1/FAS axis determines CD4 T stem cell memory levels and apoptosis in healthy controls and Adult T-cell Leukemia patients
Source: PubMed Central journal article supplement — Oncoimmunology. 2018 Feb 13;7(5):e1426423. doi: 10.1080/2162402X.2018.1426423 (PMC5927537; doi:10.1080/2162402x.2018.1426423), 2018-02-13

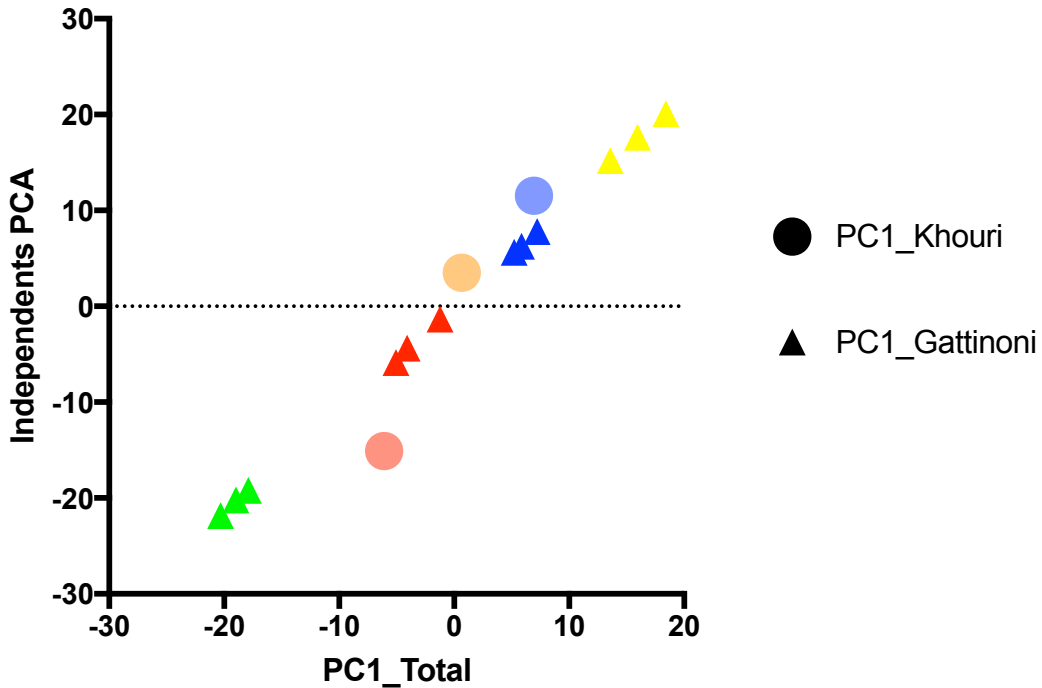

|       | PC1_Total  | PC1_Khour  | PC1_Gattinoni |
|-------|------------|------------|---------------|
| TSCM1 | -1.243016  |            | -1.332146     |
| TCM1  | 7.209223   |            | 7.805976      |
| TEM1  | 18.396098  |            | 20.111759     |
| TN1   | -17.897128 |            | -19.170410    |
| TSCM2 | -5.082275  |            | -5.858391     |
| TCM2  | 5.841912   |            | 6.273771      |
| TEM2  | 13.571519  |            | 15.223436     |
| TN2   | -20.331487 |            | -21.828252    |
| TSCM3 | -4.090271  |            | -4.350691     |
| TCM3  | 5.214703   |            | 5.663433      |
| TEM3  | 15.923722  |            | 17.642439     |
| TN3   | -18.980130 |            | -20.180924    |
| GG    | 6.918384   | 11.558982  |               |
| GA    | 0.649280   | 3.516646   |               |
| AA    | -6.100532  | -15.075628 |               |

Supplement: koni-07-05-1426423-s001.pdf [file koni-07-05-1426423-s001.pdf]
